# Supplementary material for: Microfluidic System for Cell Mixing and Particle Focusing Using Dean Flow Fractionation
Source: MDPI journal article supplement (doi:10.3390/micro3030047), 2023-07-31
Supplement: s1 [file s1]

# Biocompatible 3D printed microfluidic system for cell mixing and particle focussing using Dean flow fractionation – a practical guide

Alexander Wiede <sup>1,2</sup>, Ondrej Stranik <sup>1</sup>, Astrid Tannert <sup>1,2</sup>, and Ute Neugebauer <sup>1,2,3</sup> \*

<sup>1</sup> Leibniz-Institut für Photonische Technologien e.V. (Leibniz-IPHT), Member of Leibniz Health Technologies, Member of the Leibniz Centre for Photonics in Infection Research (LPI); Albert-Einstein-Straße 9, Jena, 07745, Germany

<sup>2</sup> Center for Sepsis Control and Care (CSCC), Universitätsklinikum Jena, Am Klinikum 1, Jena, 07747, Germany

<sup>3</sup> Institute of Physical Chemistry (IPC) and Abbe Center of Photonics (ACP), Friedrich Schiller University Jena; Helmholtzweg 4, Jena, 07743, Germany

\* Correspondence: ute.neugebauer(a)leibniz-ipht.de; Tel.: +49 (0) 3641 206-103

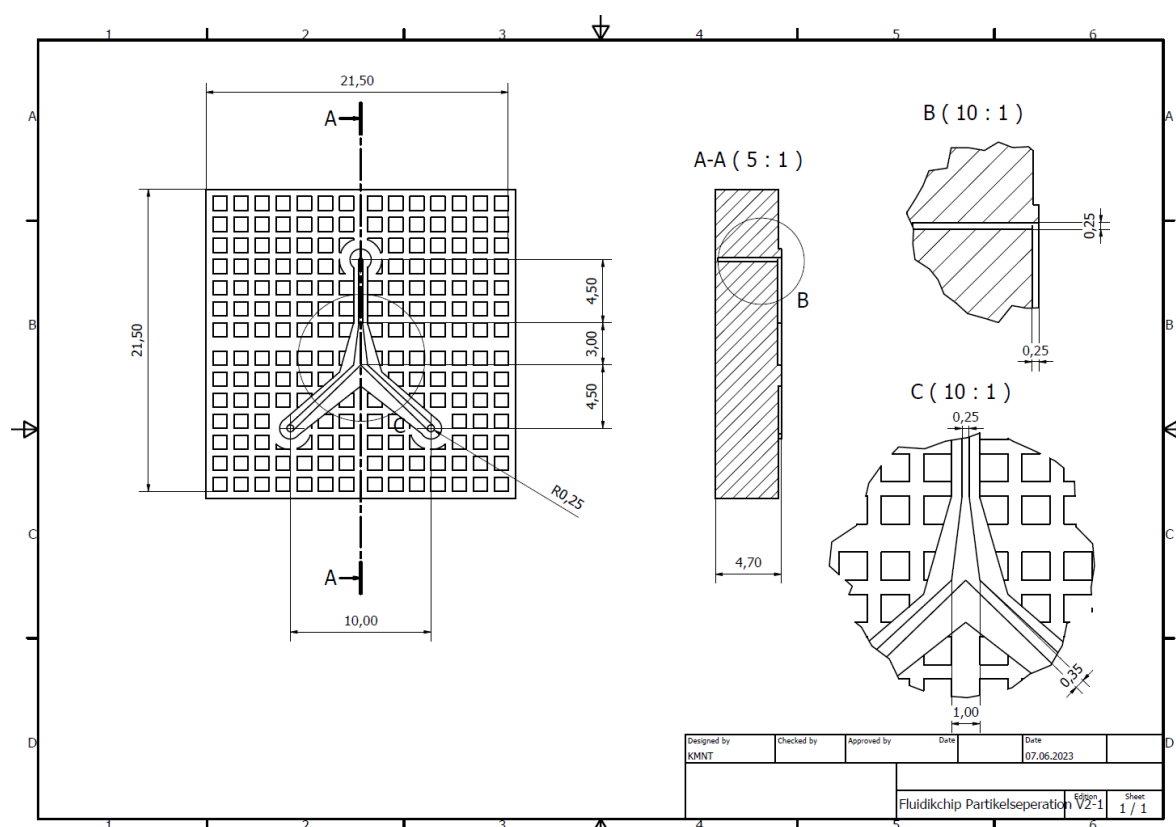

Supplementary Figure S1: Technical drawings for the Y-junction chip shown in Figure 2 main manuscript.

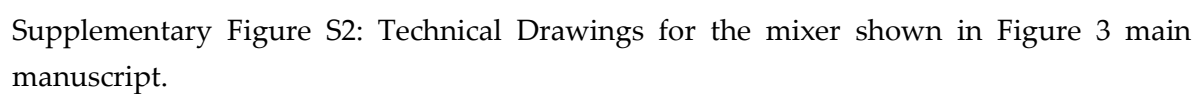

A)

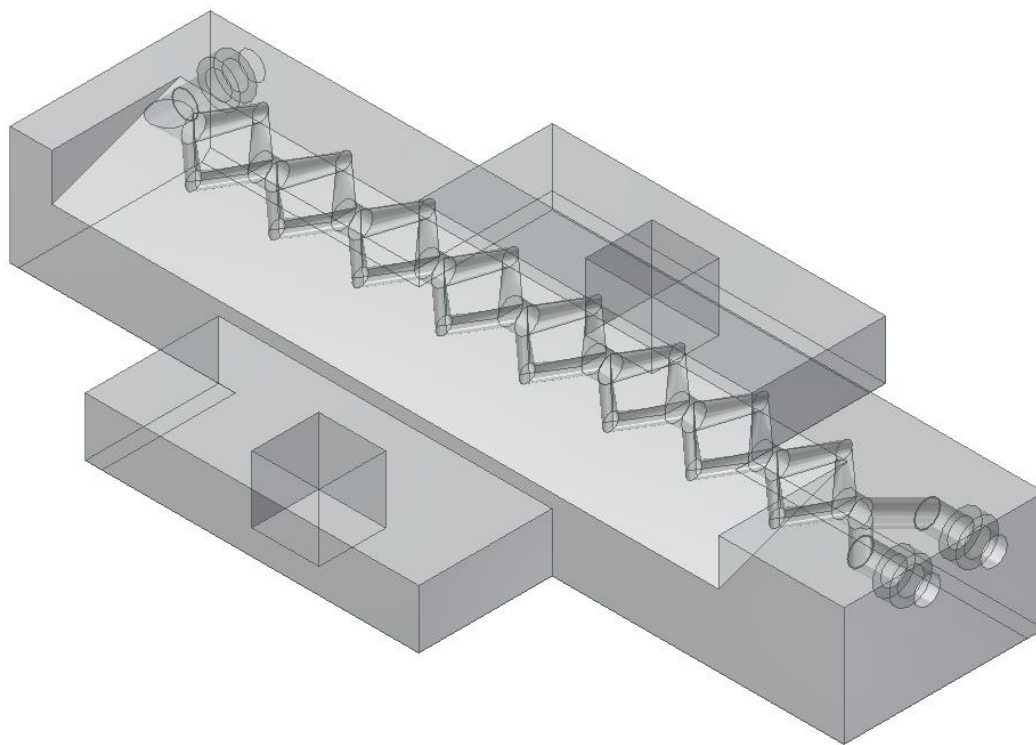

B)

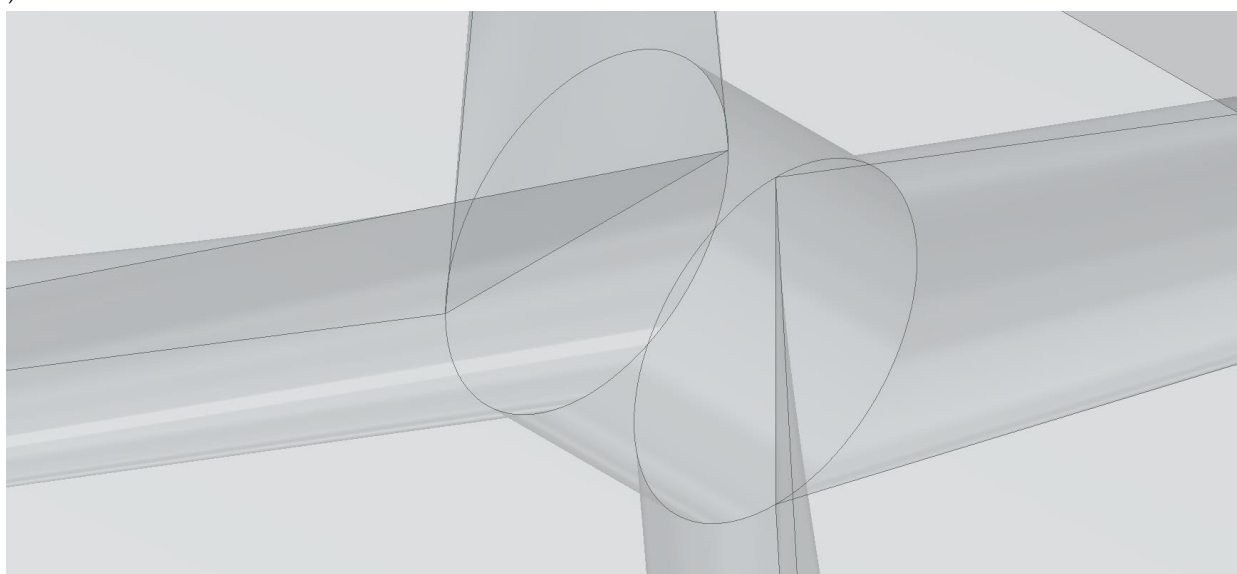

Supplementary Figure S3: Detailed sketches of the mixer design from Figure 3b, main manuscript. A: overview image. B: single chamber.
